# Supplementary material
Source: Elsevier journal article supplement (https://www.sciencedirect.com/science/article/pii/S2255534X18301142)
Supplement: mmc1 [file S2255534X18301142:mmc1.docx]

APENDICE A. ANVERSO. CUESTIONARIO SOBRE FACTORES DE RIESGO PARA ADQUIRIR LA INFECCION POR VIRUS DE LA HEPATITIS C.

Fecha: Lugar de aplicación: Sexo: Edad:

Nombre completo Teléfono Casa: Celular: Ciudad:

Estado Dirección: Núm. de Afiliación:

Por favor, conteste con la verdad, circulando en SI o No, las siguientes preguntas:

1. ¿Es usted Profesional de la salud (Medico, enfermera o de un área afín)? Si No

2. ¿Le han practicado alguna cirugía mayor antes de 1992? Si No

3. ¿Ha utilizado o utiliza drogas inyectadas (aun cuando solo haya sido

una sola ocasión)? Si No

4. ¿Ha practicado acupuntura, tiene tatuajes o perforaciones corporales? Si No

5.1 En caso de ser hombre ¿ha tenido relaciones sexuales con otro hombre? Si No

5.2 ¿Ha tenido relaciones sexuales con sexoservidoras/es? Si No

5.3¿Ha tenido más de dos parejas sexuales en menos de 6 meses? Si No

6. ¿Ha estado en algún reclusorio o cárcel? Si No

7. ¿Tiene familiares directos (padres, hermanos, hijos)

o conyugue con hepatitis C o cirrosis? Si No

8. ¿Le han diagnosticado Hemofilia? Si No

9.- ¿Recibió trasfusiones de sangre o derivados antes de 1992? Si No

10. ¿Se ha pinchado accidentalmente con agujas usadas? SI No

11. ¿Está usted en programa de diálisis o hemodiálisis? Si No

12. ¿Nació entre 1946 y 1965? Si No

13. ¿Le han diagnosticada previamente hepatitis C? Si No

14. ¿Tiene o tuvo alguna pareja sexual con diagnóstico de hepatitis C? Si No

15. ¿Fue hijo de madre portadora de hepatitis C en el embarazo? Si No

16. ¿Ha usado drogas inhaladas? Si No

*APENDICE A. REVERSO. CONSENTIMIENTO INFORMADO*

*Estoy consciente y acepto participar de manera voluntaria en el estudio sobre Factores de riesgo para la adquisición de la infección por VHC, el cual consta del llenado de una encuesta y en base a dicho resultado, la determinación de una prueba rápida en sangre con el fin principal de conocer la prevalencia de la enfermedad y los factores que contribuyen a la adquisición de la misma.*

*Se me informo que, en caso de requerirlo, se tomara la toma de pequeñas cantidades de sangre capilar, la extracción de sangre puede causar dolor y existe un pequeño riesgo de infección en el lugar donde se inserta la aguja*

*Al firmar este consentimiento informado, avalo que todas mis dudas con respecto a la determinación de laboratorio que se me realizara han sido expuestas a la persona que realiza esta encuesta y contestadas a mi entera satisfacción, así mismo, acepto los riesgos implícitos en la toma de la muestra para la determinación el laboratorio en caso de requerirlo.*

*Confidencialidad:*

*Todos mis datos personales y sensibles, serán tratados por los proveedores de los servicios según lo establecido en la ley Federal de Protección de Datos Personales en Posesión de los Particulares.*

*Autorizo y me hago conocedor que el resultado de la prueba me será entregado a través de mi médico, siendo este el único que tendrá acceso a dicho resultado y a la información contenida en esta solicitud, debiendo siempre conservar la confidencialidad de la misma.*

*Nombre y Firma del participante Nombre y firma del testigo*
